# Supplementary material
Source: PubMed Central journal article supplement (PMC5384840)

**Figure e-1.** Histograms of AV-1451 SUVR voxel values from target (red) and contralateral (blue) ROIs are presented in both rows; vertical dashed line represents ROI mean.

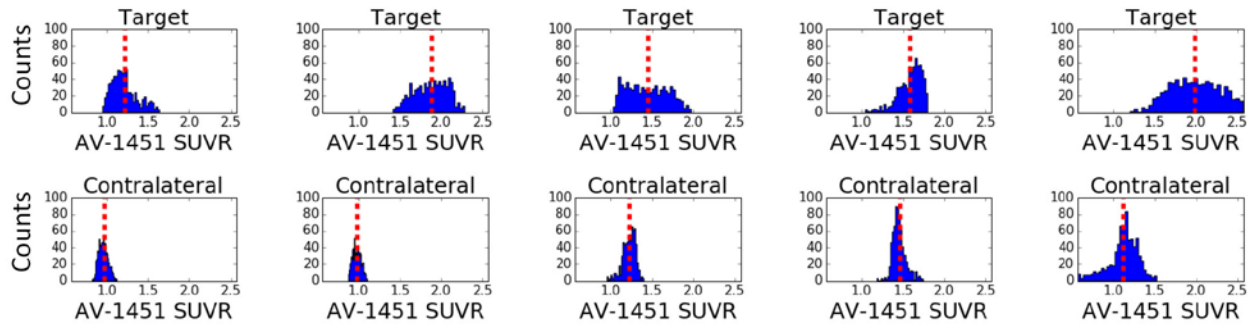

Supplement: supp_WNL.0000000000003724_Figure_e-1.pdf [file supp_WNL.0000000000003724_Figure_e-1.pdf]
